# Supplementary material for: Long-Term Persistence of Three Microbial Wildfire Biomarkers in Forest Soils
Source: MDPI journal article supplement (doi:10.3390/f14071383), 2023-07-06
Supplement: s1 [file s1]

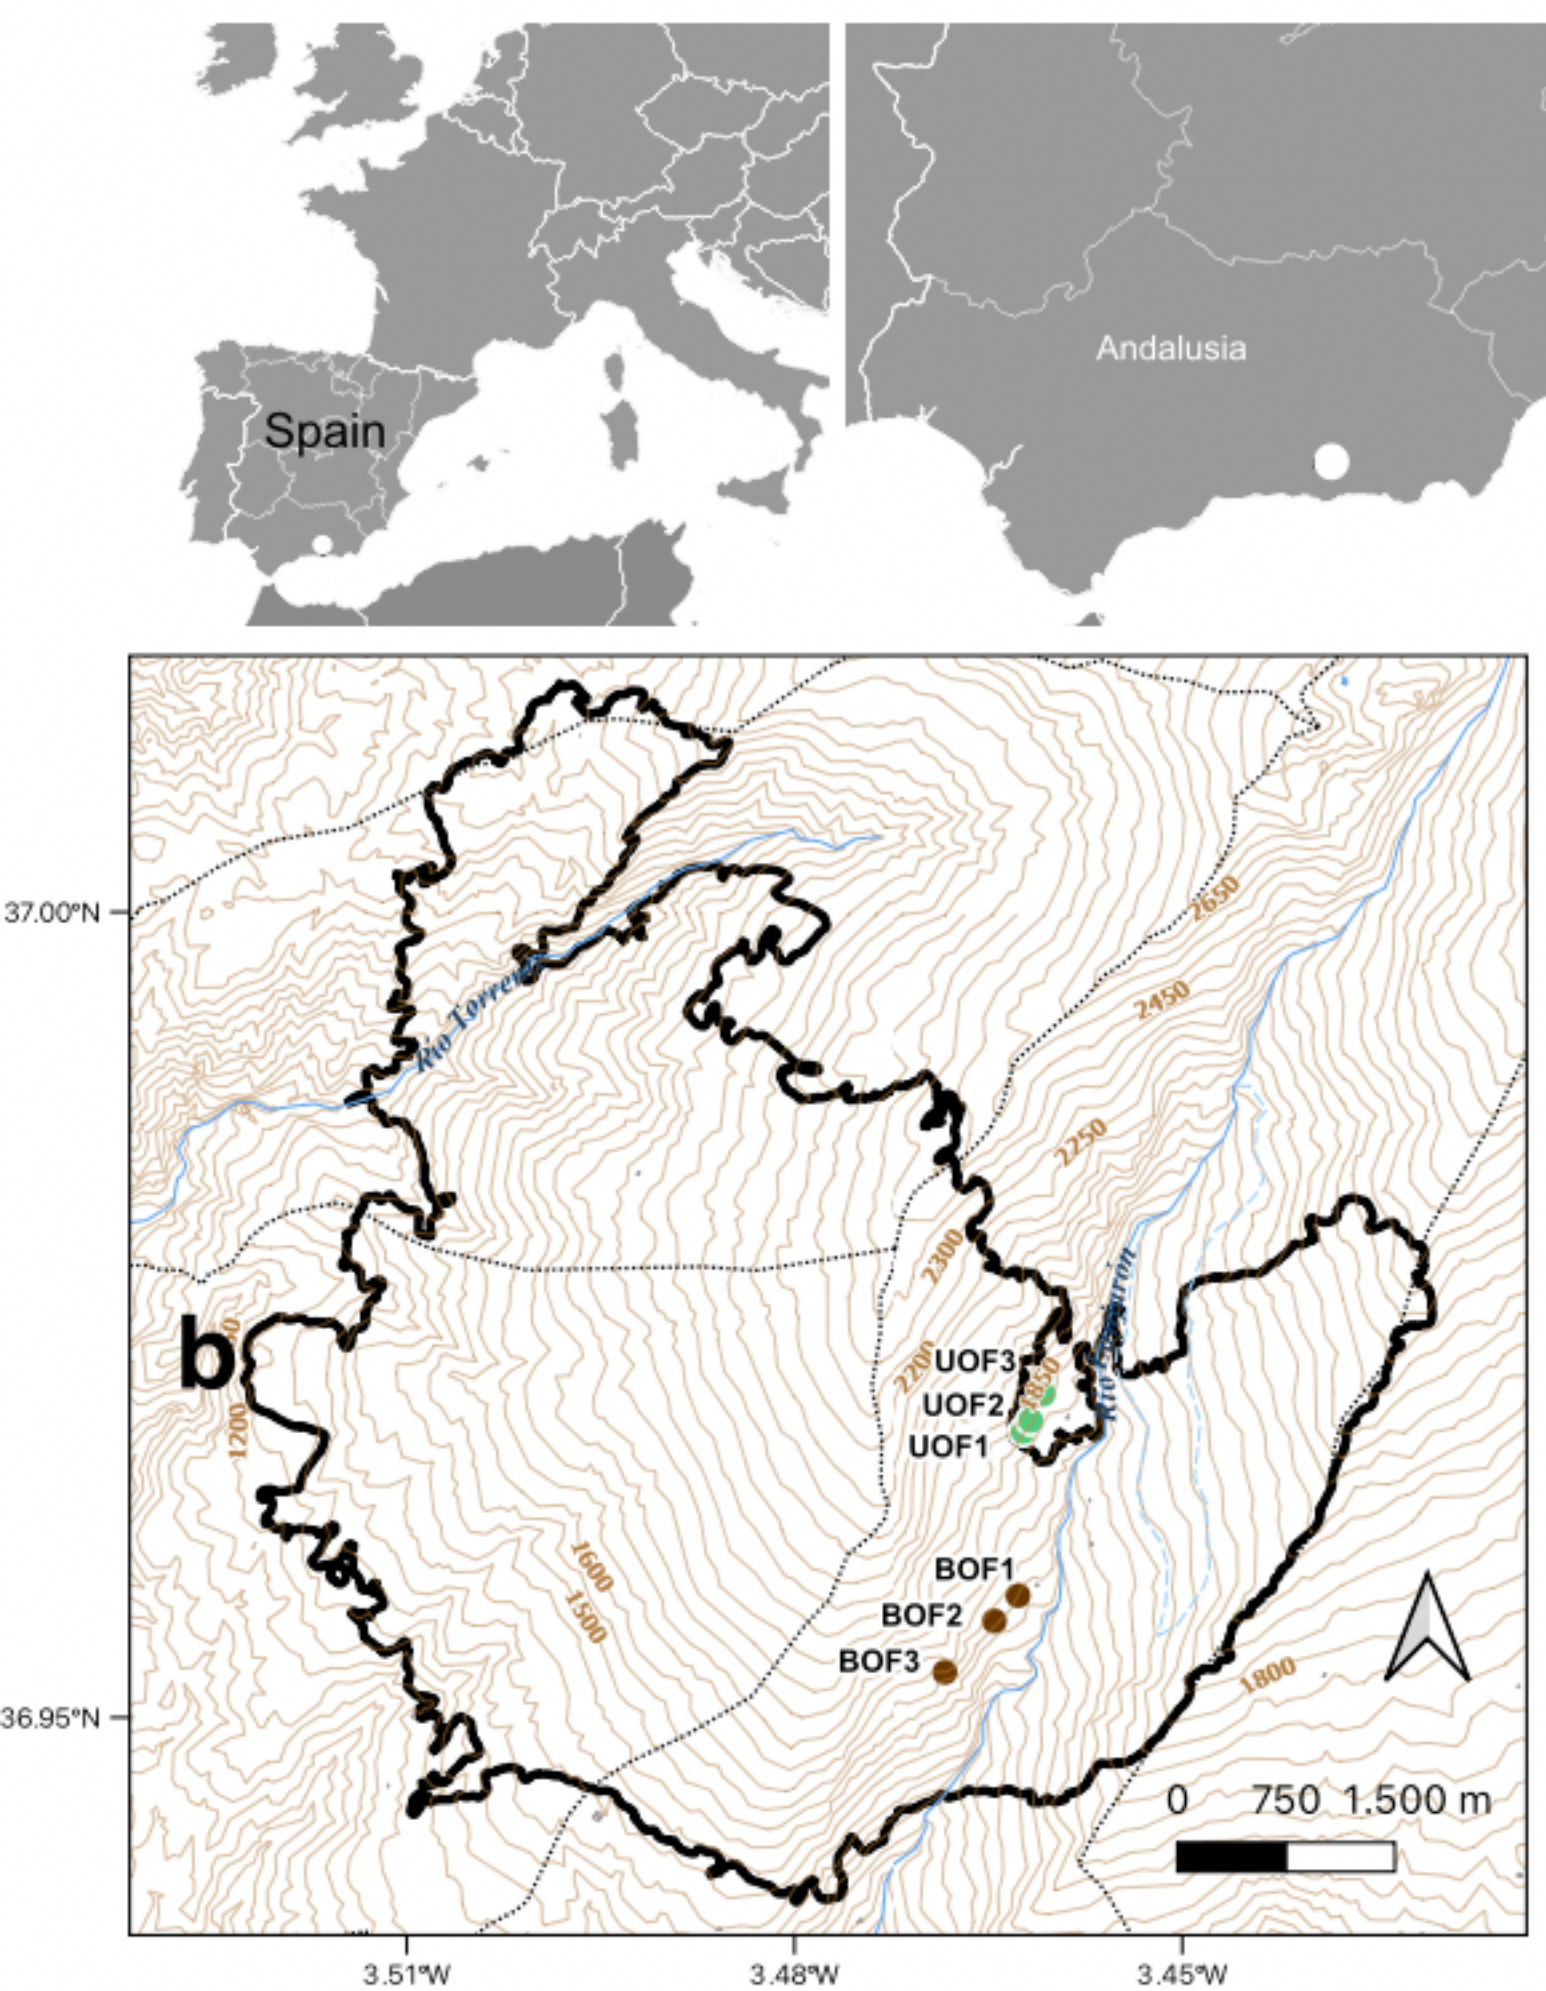

**Figure S1.** Map of the sampling area

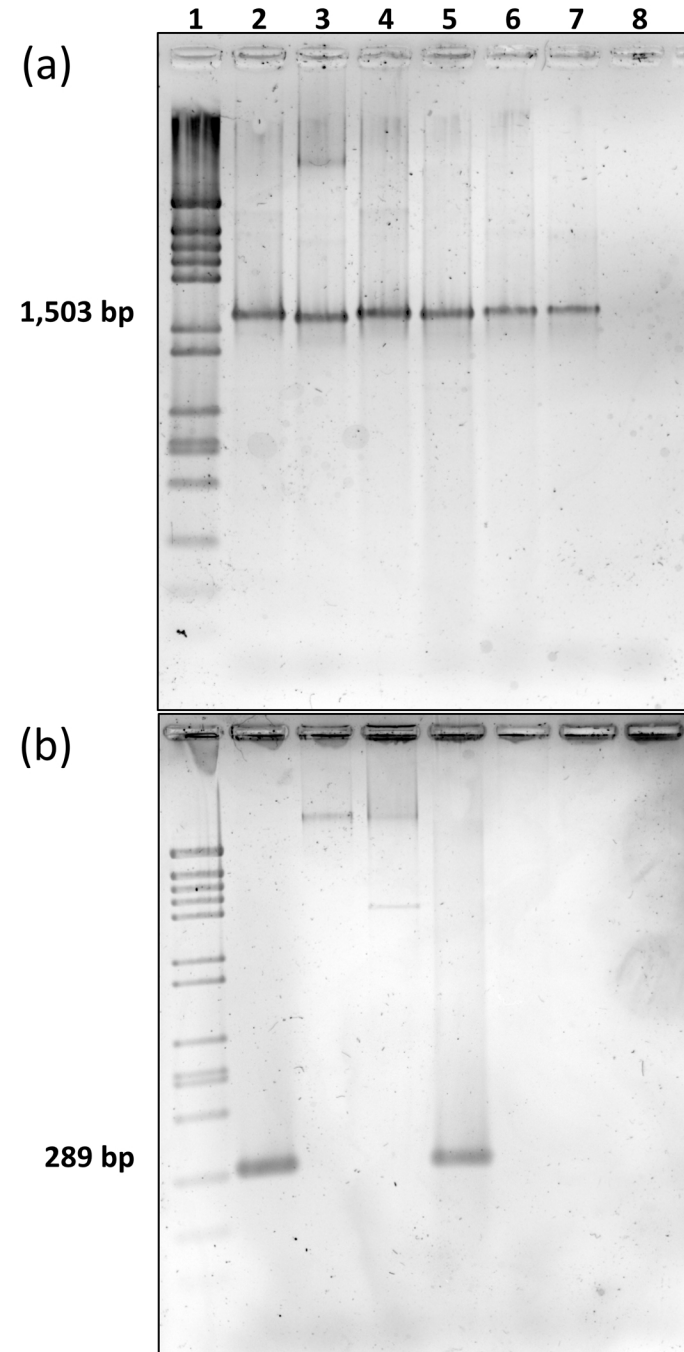

| Line | Strain                                 | Reference                             |                                  |
|------|----------------------------------------|---------------------------------------|----------------------------------|
| 1.   | Ø29 Ladder                             |                                       |                                  |
| 2.   | <i>Arthrobacter</i> sp. AFG20.1        | Fernández-González <i>et al.</i> 2017 | DOI:10.1038/s41598-017-06112-3   |
| 3.   | <i>Bradyrhizobium canariense</i> GV102 | Cobo-Díaz <i>et al.</i> 2014          | DOI:10.1016/j.syapm.2013.09.008  |
| 4.   | <i>Pseudomonas</i> sp. P49             | Lasa <i>et al.</i> 2019               | DOI:10.1371/journal.pone.0214422 |
| 5.   | <i>Streptomyces</i> sp. NMW37          | Unpublished                           |                                  |
| 6.   | <i>Escherichia coli</i> DH5α           | Bethesda Research Laboratories 1986   |                                  |
| 7.   | <i>Paenibacillus polymyxa</i> PIC73    | Gómez-Lama Cabanás <i>et al.</i> 2018 | DOI:10.3390/agriculture8070090   |
| 8.   | Negative control                       |                                       |                                  |

**Figure S2.** PCR to check actinobacterial primers specificity. Panel (a) shows PCRs of universal primers for *16S rRNA* gene (9bfm and 1512ur). Panel (b) shows PCRs of primer pair 3AF and Act2R for actinobacterial *16S rRNA* gene amplification used in qPCRs.
